# Supplementary material for: High-performance nickel manganese ferrite/oxidized graphene composites as flexible and binder-free anodes for Li-ion batteries
Source: Royal Society of Chemistry journal article supplement (doi:10.1039/c5ra03556b), 2015-01-01
Supplement: c5ra03556b2.pdf [file c5ra03556b2.pdf]

## Supplementary Information

### **High-performance nickel manganese ferrite/oxidized graphene composites as flexible and binder-free anodes for Li-ion batteries**

Zailei Zhang,<sup>\*a</sup> Qiangqiang Tan,<sup>\*a</sup> Ziyi Zhong,<sup>b</sup> and Fabing Su<sup>\*a</sup>

<sup>a</sup> *State Key Laboratory of Multiphase Complex Systems, Institute of Process Engineering, Chinese Academy of Sciences, Beijing, China 100190,*

<sup>b</sup> *Institute of Chemical Engineering and Sciences, A\*star, 1 Pesek Road, Jurong Island, Singapore 627833*

<sup>\*</sup>Corresponding authors. E-mail address: zhangzl@ipe.ac.cn (Z. Zhang); qtan@ipe.ac.cn (Q. Tan); fbsu@ipe.ac.cn (F. Su), Tel.: +86-10-82544850, Fax: +86-10-82544851.

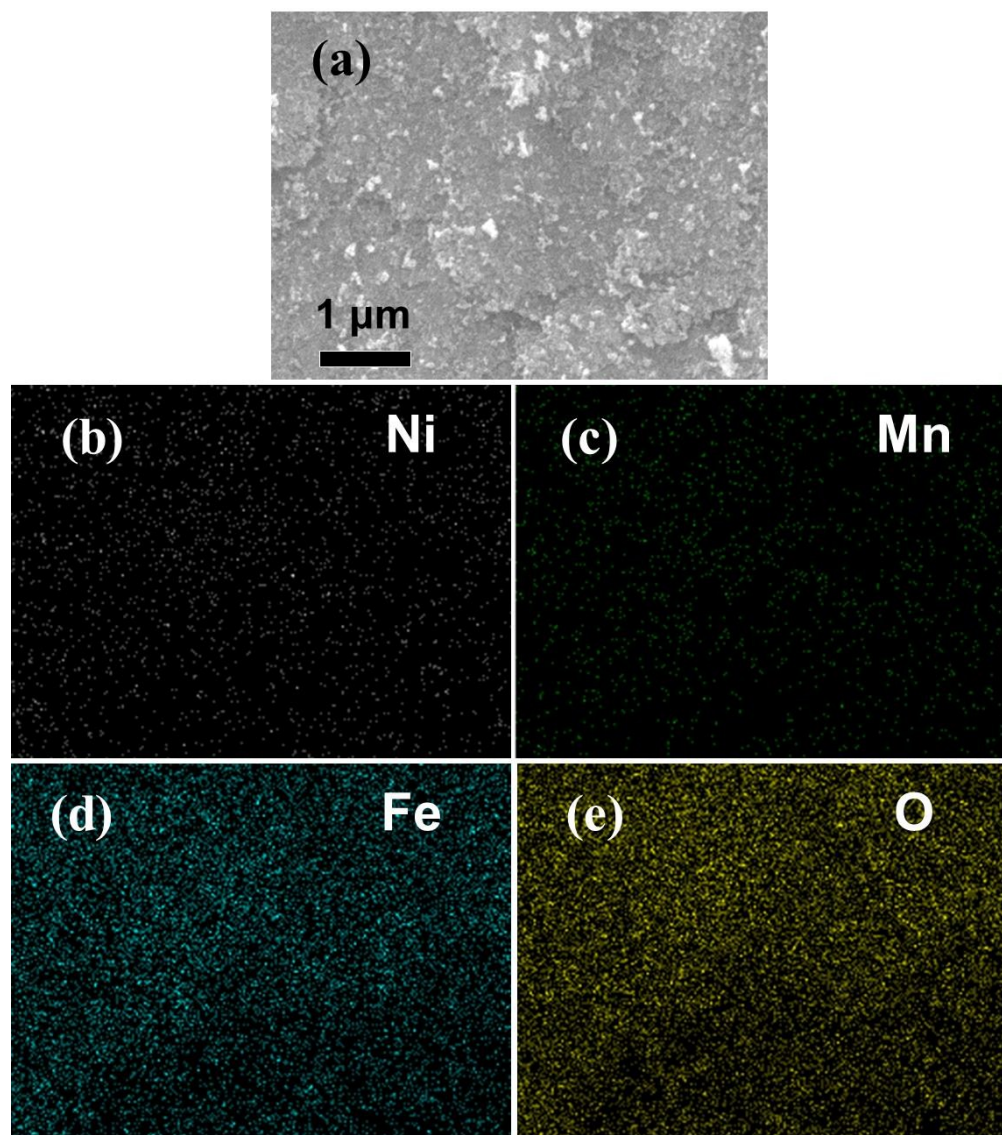

**Fig. S1** SEM image of NMFO nanoparticles (a), and corresponding elemental mapping images of Ni (b), Mn (c), Fe (d), and O (e) for NMFO nanoparticles.

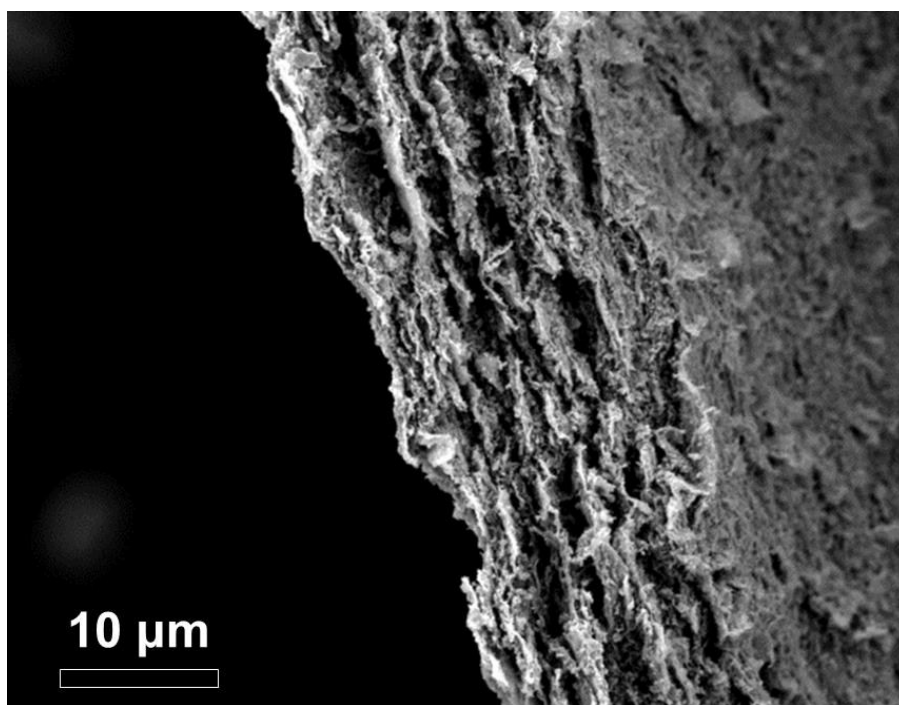

**Fig. S2** Cross-sectional SEM image of free-standing NMFO/OGP film without alternate adding more OGP.

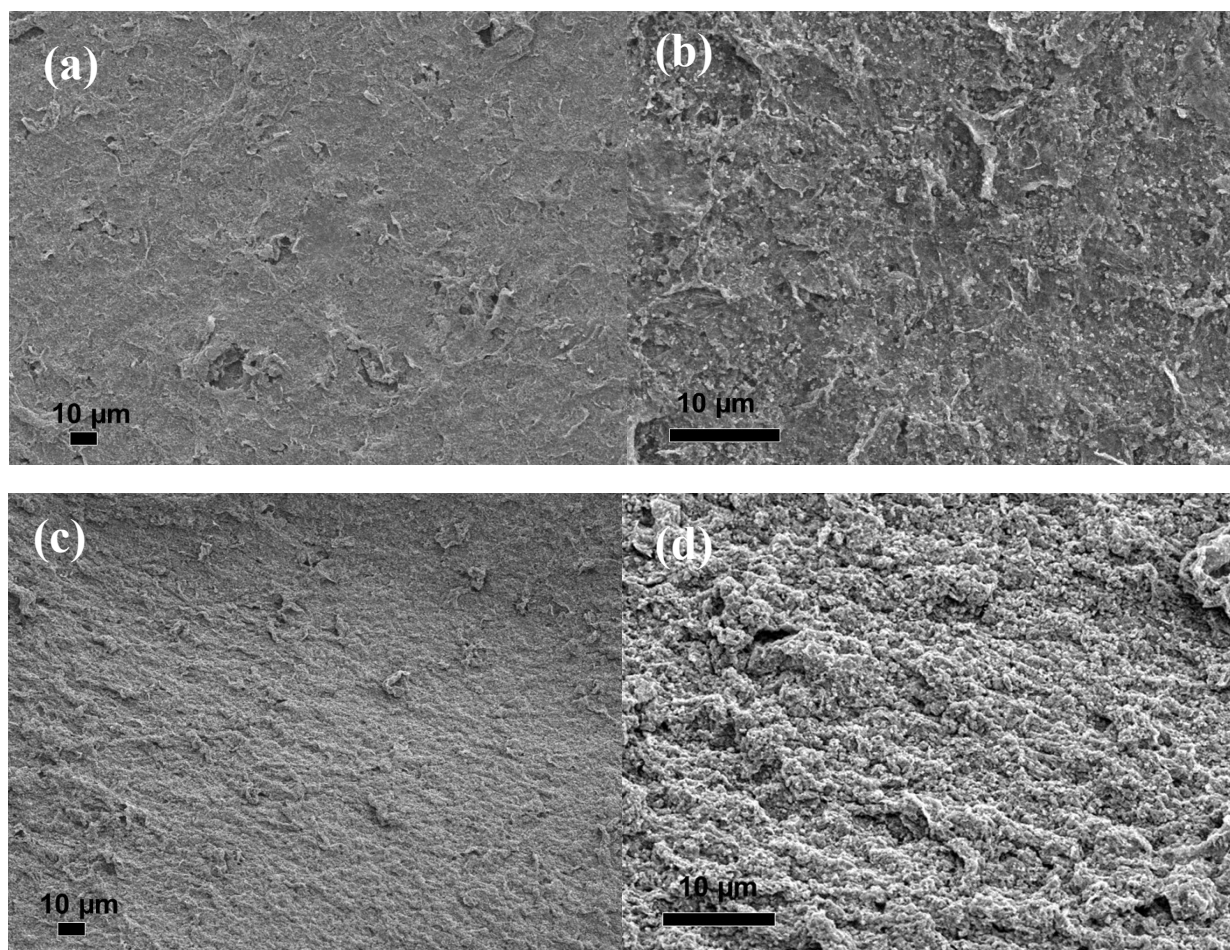

**Fig. S3** SEM images of the electrode disks containing charged free-standing NMFO/OGP film (a and b), and NMFO/OGP coated on polypropylene microporous film (c and d) after 100 discharge–charge cycles with washing.
